# Supplementary material
Source: MDPI journal article supplement (https://www.mdpi.com/2311-7524/7/11/514)
Supplement: s1 [file s1]

**Supplementary Table S1.** Weekly averaged rainfall data during crop season of 2018-19 at CCS Haryana Agricultural University, Hisar.

| Standard Meteorological Weeks | Dates                     | Total Rainfall (mm) |
|-------------------------------|---------------------------|---------------------|
| 42                            | 15 October - 21 October   | 0.0                 |
| 43                            | 22 October - 28 October   | 0.0                 |
| 44                            | 29 October - 04 November  | 0.0                 |
| 45                            | 05 November - 11 November | 0.0                 |
| 46                            | 12 November - 18 November | Trace               |
| 47                            | 19 November - 25 November | 0.0                 |
| 48                            | 26 November - 02 December | 0.0                 |
| 49                            | 03 December - 09 December | 0.0                 |
| 50                            | 10 December - 16 December | 0.0                 |
| 51                            | 17 December - 23 December | 0.0                 |
| 52                            | 24 December - 31 December | 0.0                 |
| 1                             | 01 January - 07 January   | 1.0                 |
| 2                             | 08 January - 14 January   | 0.0                 |
| 3*                            | 15 January - 21 January   | 0.0                 |
| 4*                            | 22 January - 28 January   | 0.9                 |
| 5*                            | 29 January - 4 February   | 0.0                 |
| 6*                            | 05 February - 11 February | 0.0                 |
| 7                             | 12 February - 18 February | 0.0                 |
| 8                             | 19 February - 25 February | Trace               |
| 9                             | 26 February - 04 Mar      | 2.1                 |
| 10                            | 05 March - 11 March       | 0.0                 |
| 11                            | 12 March - 18 March       | 0.0                 |
| 12                            | 19 March - 25 March       | 0.0                 |
| 13                            | 26 March - 01 April       | 0.0                 |
